# Supplementary material for: Iceberg calving of Thwaites Glacier, West Antarctica: full-Stokes modeling combined with linear elastic fracture mechanics
Source: Copernicus journal article supplement (doi:10.5194/tc-11-1283-2017), 2017-05-30
Supplement: Supplementary file 2 [file tc-11-1283-2017-supplement.zip]

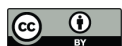

## *Supplement of*

# **Iceberg calving of Thwaites Glacier, West Antarctica: full-Stokes modeling combined with linear elastic fracture mechanics**

**H. Yu et al.**

*Correspondence to:* Hongju Yu ([hongjuy@uci.edu](mailto:hongjuy@uci.edu))

- [tc-11-1283-2017-supplement-title-page.pdf](#)
- [supplementary](#)
  - [inputdata.nc](#)
  - [tc\\_crevasse\\_sup.pdf](#)

The copyright of individual parts of the supplement might differ from the CC-BY 3.0 licence.
